# Supplementary material for: Quantitative Structure–Activity Relationship Study of Bitter Di-, Tri- and Tetrapeptides Using Integrated Descriptors
Source: PubMed Central journal article supplement (PMC6696392; doi:10.3390/molecules24152846), 2019-08-05
Supplement: molecules-24-02846-s001.pdf [file molecules-24-02846-s001.pdf]

Table S1. Dataset of dipeptides

| Number | Sequence | log(1/T) | References | Number | Sequence | log(1/T) | References |
|--------|----------|----------|------------|--------|----------|----------|------------|
| 1      | GV       | 1.13     | [40]       | 25     | FG       | 1.77     | [40]       |
| 2      | AV       | 1.16     | [40]       | 26     | GY       | 1.77     | [40]       |
| 3      | VA       | 1.16     | [40]       | 27     | GF       | 1.80     | [40]       |
| 4      | VG       | 1.19     | [40]       | 28     | PY       | 1.80     | [40]       |
| 5      | PA       | 1.32     | [40]       | 29     | GW       | 1.89     | [40]       |
| 6      | GP       | 1.35     | [40]       | 30     | VL       | 2.00     | [40]       |
| 7      | ID       | 1.37     | [40]       | 31     | IV       | 2.05     | [40]       |
| 8      | IE       | 1.37     | [40]       | 32     | PL       | 2.22     | [40]       |
| 9      | IN       | 1.49     | [40]       | 33     | II       | 2.26     | [40]       |
| 10     | IQ       | 1.49     | [40]       | 34     | IL       | 2.26     | [40]       |
| 11     | IS       | 1.49     | [40]       | 35     | PI       | 2.33     | [40]       |
| 12     | IT       | 1.49     | [40]       | 36     | LL       | 2.35     | [40]       |
| 13     | SL       | 1.49     | [40]       | 37     | IP       | 2.40     | [40]       |
| 14     | WE       | 1.56     | [40]       | 38     | YL       | 2.40     | [40]       |
| 15     | IK       | 1.65     | [40]       | 39     | LY       | 2.46     | [40]       |
| 16     | GL       | 1.68     | [40]       | 40     | FP       | 2.70     | [40]       |
| 17     | IA       | 1.68     | [40]       | 41     | LF       | 2.75     | [40]       |
| 18     | IG       | 1.68     | [40]       | 42     | PF       | 2.80     | [40]       |
| 19     | AL       | 1.70     | [40]       | 43     | FL       | 2.87     | [40]       |
| 20     | GI       | 1.70     | [40]       | 44     | IW       | 3.05     | [40]       |
| 21     | VV       | 1.71     | [40]       | 45     | FF       | 3.10     | [40]       |
| 22     | AF       | 1.72     | [40]       | 46     | FY       | 3.13     | [40]       |
| 23     | LA       | 1.72     | [40]       | 47     | LW       | 3.40     | [40]       |
| 24     | LG       | 1.72     | [40]       | 48     | WW       | 3.60     | [40]       |

Table S2. Dataset of tripeptides

| Number | Sequence | log(1/T) | References | Number | Sequence | Log(1/T) | References |
|--------|----------|----------|------------|--------|----------|----------|------------|
| 1      | LGG      | 1.00     | [38]       | 26     | FFG      | 2.65     | [36]       |
| 2      | GGV      | 1.48     | [42]       | 27     | PPP      | 2.70     | [36]       |
| 3      | PGR      | 1.60     | [36]       | 28     | RPF      | 2.83     | [36]       |
| 4      | GPG      | 1.70     | [46]       | 29     | EGG      | 2.83     | [45]       |
| 5      | GYG      | 1.70     | [39]       | 30     | FIV      | 2.83     | [42]       |
| 6      | RGP      | 1.90     | [36]       | 31     | GGF      | 2.83     | [36]       |
| 7      | GLG      | 2.00     | [38]       | 32     | GGY      | 2.83     | [39]       |
| 8      | GGL      | 2.00     | [38]       | 33     | GLL      | 2.83     | [38]       |
| 9      | GGP      | 2.04     | [46]       | 34     | PIP      | 2.85     | [47]       |
| 10     | PGP      | 2.04     | [46]       | 35     | VIF      | 2.89     | [39]       |
| 11     | PPG      | 2.04     | [46]       | 36     | LLL      | 2.92     | [38]       |
| 12     | LLG      | 2.30     | [38]       | 37     | FGF      | 2.92     | [36]       |
| 13     | LGL      | 2.30     | [38]       | 38     | YGY      | 3.10     | [39]       |
| 14     | FGG      | 2.34     | [36]       | 39     | DLL      | 3.10     | [36]       |
| 15     | FPP      | 2.34     | [39]       | 40     | GRP      | 3.10     | [45]       |
| 16     | GVV      | 2.34     | [41]       | 41     | RPG      | 3.10     | [36]       |
| 17     | PGG      | 2.34     | [39]       | 42     | YYG      | 3.20     | [39]       |
| 18     | VVV      | 2.34     | [39]       | 43     | GFF      | 3.23     | [36]       |
| 19     | RRR      | 2.40     | [44]       | 44     | PFP      | 3.40     | [46]       |
| 20     | VYP      | 2.52     | [46]       | 45     | KPF      | 3.40     | [39]       |
| 21     | KPK      | 2.52     | [46]       | 46     | GYG      | 3.40     | [39]       |
| 22     | GFG      | 2.52     | [36]       | 47     | FPP      | 3.40     | [39]       |
| 23     | FPK      | 2.52     | [39]       | 48     | ELL      | 3.40     | 44         |
| 24     | YGG      | 2.63     | [39]       | 49     | YPF      | 3.52     | [46]       |
| 25     | PPF      | 2.63     | [39]       | 50     | YYY      | 3.70     | [39]       |
| 26     | PGI      | 2.63     | [46]       | 52     | FFF      | 3.70     | [36]       |

**Table S3. Dataset of tetrapeptides**

| <b>Number</b> | <b>Sequence</b> | <b>References</b> | <b>log(1/T)</b> | <b>Number</b> | <b>Sequence</b> | <b>Log(1/T)</b> | <b>References</b> |
|---------------|-----------------|-------------------|-----------------|---------------|-----------------|-----------------|-------------------|
| 1             | GGLG            | [38]              | 1.60            | 13            | LLLL            | 3.23            | [38]              |
| 2             | GLGG            | [38]              | 1.70            | 14            | RPFG            | 3.41            | [37]              |
| 3             | LGGG            | [38]              | 1.90            | 15            | FGFG            | 3.52            | [41]              |
| 4             | GGGL            | [38]              | 2.34            | 16            | VYPF            | 3.52            | [39]              |
| 5             | PFPP            | [46]              | 2.34            | 17            | PFIV            | 3.52            | [43]              |
| 6             | FFGG            | [44]              | 2.52            | 18            | GPFF            | 3.80            | [37]              |
| 7             | FFPP            | [39]              | 2.52            | 19            | RGFF            | 3.80            | [37]              |
| 8             | GPPF            | [39]              | 2.52            | 20            | RPGF            | 3.80            | [37]              |
| 9             | RRPP            | [44]              | 2.70            | 21            | FGGF            | 3.92            | [41]              |
| 10            | FFPE            | [44]              | 2.76            | 22            | FFPR            | 4.00            | [37]              |
| 11            | GGFF            | [44]              | 2.85            | 23            | RPF             | 4.40            | [39]              |
| 12            | FFPG            | [44]              | 2.90            |               |                 |                 |                   |

Table S4. Equations of QSAR models for di-, tri- and tetrapeptides of the smallest RMSECV obtained by 100 BOSS runs

| Name                       | Equation                                                                                                                                                                    |
|----------------------------|-----------------------------------------------------------------------------------------------------------------------------------------------------------------------------|
| Dipeptides <sup>a</sup>    | $y = 0.0450X1 + 0.3069X2 + 0.0016X3 + 0.1197X4 + 0.0141X5 - 0.2338X6 - 0.0249X7 + 0.0318X8 + 0.0014X9 + 0.0813X10 + 0.0595X11 + 0.2551X12 + 0.0622X13 + 0.0964X14 + 1.4388$ |
| Tripeptides <sup>b</sup>   | $y = -0.0358X1 - 0.1085X2 + 0.1825X3 + 0.1914X4 - 0.0520X5 + 0.0545X6 + 0.0561X7 + 0.5071X8 + 0.1435X9 + 0.2747X10 - 0.3066X11 + 2.3371$                                    |
| Tetrapeptides <sup>c</sup> | $y = 0.4470X1 - 0.0695X2 - 0.1596X3 - 1.2383X4 - 0.2170X5 - 0.87895X6 + 0.6643X7 + 0.3932X8 - 4.3698X9 + 5.04325.0432$                                                      |

<sup>a</sup> Dipeptides: X1: N1-5z-2 ; X2: N1-MS-WHIM-3; X3: N1-ISA-ECI-1; X4: N1-VHSE-1; X5: N1-VSW-1; X6: N1-T-3 ; X7: N2-3z-1; X8: N2-DPPS-1; X9: N2-ISA-ECI-1; X10: N2-VHSE-1; X11: N2-VSW-7; X12: N2-E-2; X13: N2-V-3; X14: N2-HESH-2

<sup>b</sup> Tripeptides: X1: N1-VSW-3; X2: N1-T-4; X3: N1-ST-2; X4: N1-G-3; X5: N1-HESH-1; X6: N2-DPPS-1; X7: N1-FASGAI-2; X8: N2-V-1; X9: N3-VHSE-1; X10: N3-ST-3; X11: N3-ST-7

<sup>c</sup> Tetrapeptides: X1: N1-MS-WHIM-2; X2: N1-VSW-3; X3: N1-G-7; X4: N2-E-4; X5: N3-HESH-8; X6: N3-HESH-9; X7: N4-VHSE-5; X8: N4-G-8
